# Supplementary material for: Dynamics of lubricious, concentrated PMMA brush layers studied by surface forces and resonance shear measurements
Source: Royal Society of Chemistry journal article supplement (doi:10.1039/c9sm01133a), 2019-01-01
Supplement: c9sm01133a1.pdf [file c9sm01133a1.pdf]

**Supplemental Material For:**

**Dynamics of Lubricous, Concentrated PMMA Brush  
Layers Studied by Surface Forces and Resonance  
Shear Measurements**

*Masashi Mizukami<sup>a</sup>, Masao Gen<sup>1</sup>, Shu-Yao Hsu<sup>b</sup>, Yoshinobu Tsujii<sup>b</sup> and Kazue Kurihara<sup>a,c\*</sup>*

<sup>a</sup> Institute of Multidisciplinary Research for Advanced Materials, Tohoku University, Sendai,  
980-8577, Japan

<sup>b</sup> Institute for Chemical Research, Kyoto University, Uji, Kyoto 611-0011, Japan

<sup>c</sup> New Industry Creation Hatchery Center, Tohoku University, Sendai, Sendai, Sendai, 980-8599,  
Japan

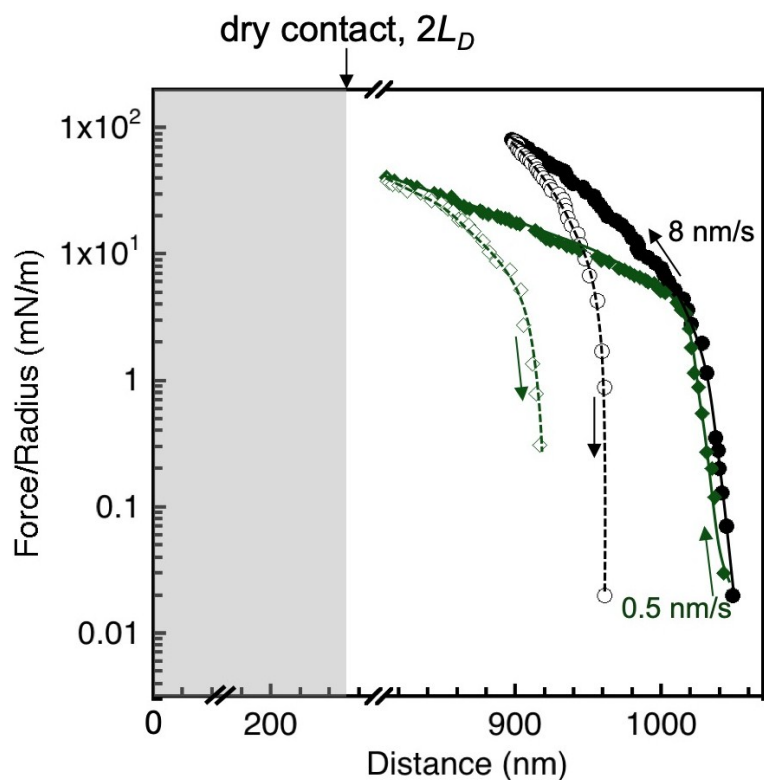

**Fig. S1** Plots of force/radius ( $F/R$ ) vs surface separation distance ( $D$ ) between PMMA brush layers fabricated on silica surfaces. The force profiles were obtained with driving speeds of 8 nm/s (filled and open circle) and 0.5 nm/s (filled and open diamond). The  $D$  was obtained by measuring relative distance ( $D'$ ) from the dry contact of PMMA, and by adding the two PMMA layer thicknesses ( $2L_D$ ).

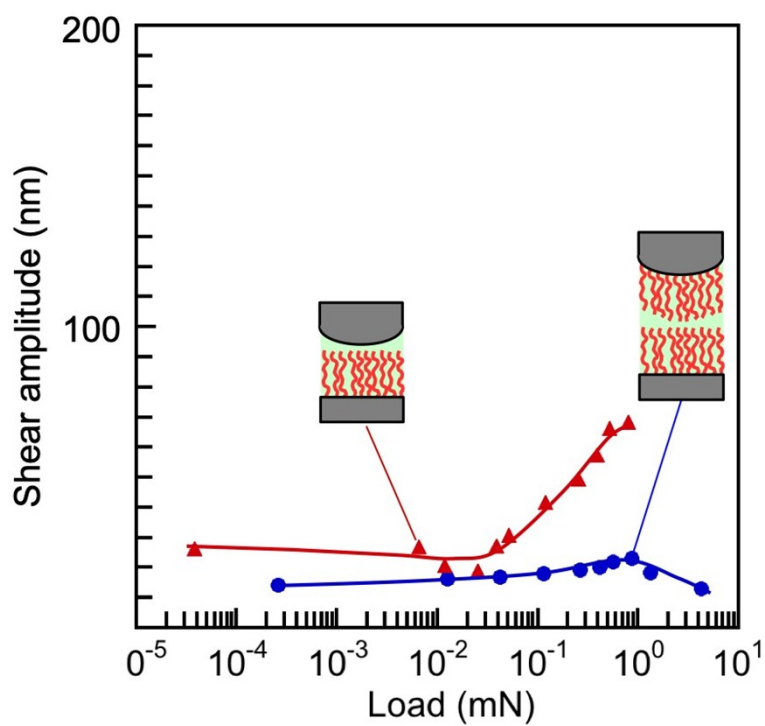

**Fig. S2** Plots of shear amplitudes vs load ( $L$ ) obtained for PMMA-PMMA brush layers (blue filled circle) as well as for PMMA brush-silica surface (red filled triangle).

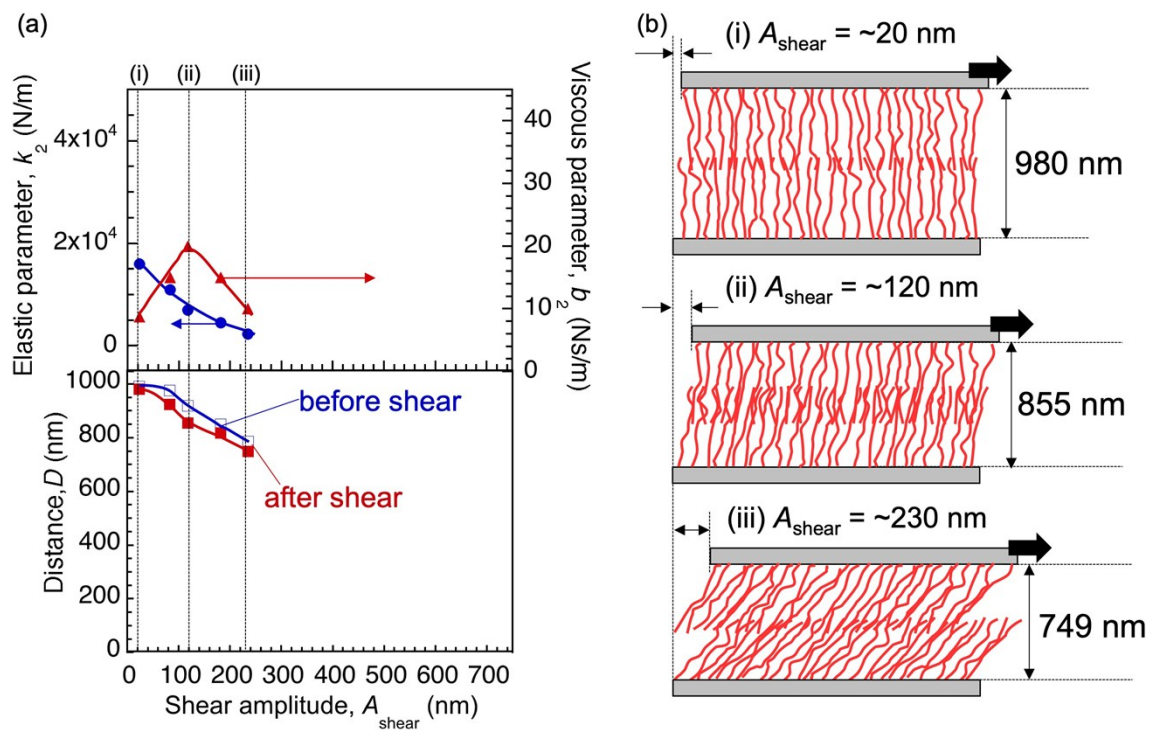

**Fig. S3** (a) Plots of the elastic ( $k_2$ , filled circle) and damping ( $b_2$ , filled triangle) parameters (top), and distance ( $D$ ) before (open square) and after (filled square) shear measurements (bottom) against the shear amplitude ( $A_{\text{shear}}$ ) obtained at the applied loads of 0.85 mN. (b) Schematic illustration of PMMA brushes drawn based on the results at the shear amplitudes of (i)  $A_{\text{shear}} = 20$  nm, (ii)  $A_{\text{shear}} = 120$  nm, and (iii)  $A_{\text{shear}} = 230$  nm.

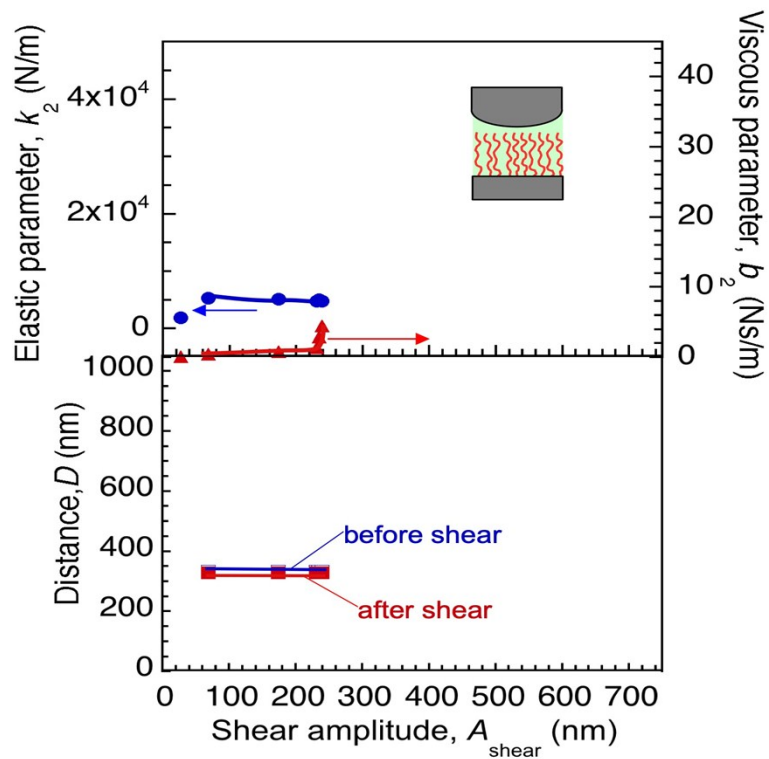

**Fig. S4** Plots of the elastic ( $k_2$ , filled circle) and damping ( $b_2$ , filled triangle) parameters (top), and distance ( $D$ ) before shear (open square) and after (filled square) shear measurements (bottom) against the shear amplitude ( $A_{\text{shear}}$ ) obtained at the applied loads of 0.79 mN for PMMA brush-silica.

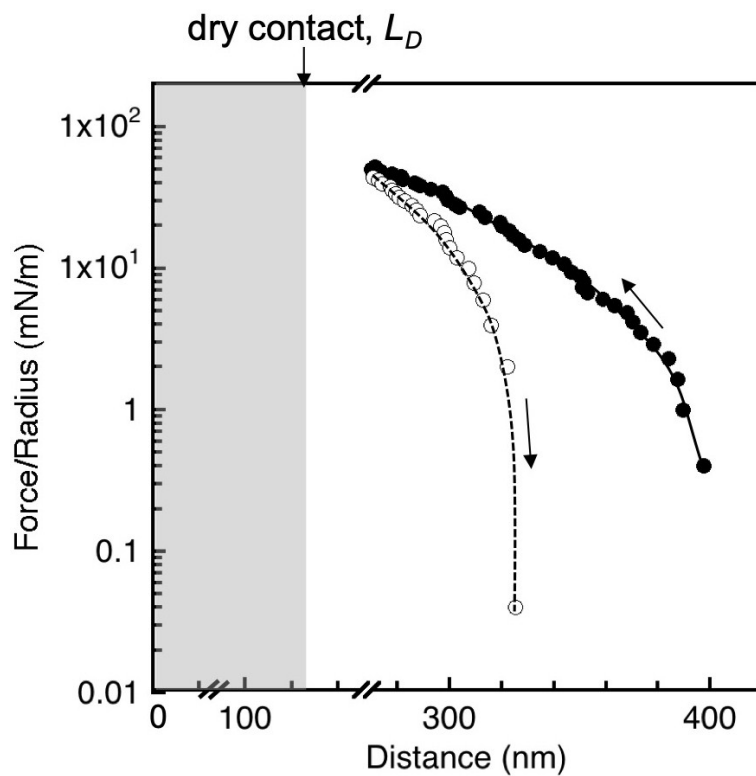

**Fig. S5** Plots of force/radius ( $F/R$ ) vs surface separation distance ( $D$ ) between a PMMA brush layer and a silica surfaces. The force profile was obtained with driving speeds of 8 nm/s (filled circle for approach and open circle for retraction). The  $D$  was obtained by measuring relative distance ( $D'$ ) from the dry contact of PMMA, and by adding a PMMA layer thickness ( $L_D$ ).
